# Supplementary material
Source: publisher figshare collection journal article supplement (https://tandf.figshare.com/ndownloader/files/17580983)
Supplement: Supplementary file 1 [file 17580983]

**Appendix A: Claim Categories**

- - - FIP Medical - General
    - FIP Medical - Rehabilitation
    - FIP Surgical
    - FIP Psychiatric - Hospital
    - FIP Psychiatric - Residential
    - FIP Alcohol and Drug Abuse - Hospital
    - FIP Alcohol and Drug Abuse - Residential
    - FIP Mat Norm Delivery
    - FIP Mat Norm Delivery - Mom\Baby Cmbnd
    - FIP Mat Csect Delivery
    - FIP Mat Csect Delivery - Mom\Baby Cmbnd
    - FIP Well Newborn - Normal Delivery
    - FIP Well Newborn - Csect Delivery
    - FIP Well Newborn - Unknown Delivery
    - FIP Other Newborn
    - FIP Maternity Non-Delivery
    - FIP SNF
    - FOP Other Observation
    - FOP Emergency Room - Hospital
    - FOP Emergency Room - Urgent Care
    - FOP Surgery - Hospital Outpatient
    - FOP Surgery - Ambulatory Surgery Center
    - FOP Radiology General - Therapeutic
    - FOP Radiology General - Diagnostic
    - FOP Radiology - CT/MRI/PET - CT Scan
    - FOP Radiology - CT/MRI/PET - MRI
    - FOP Radiology - CT/MRI/PET - PET
    - FOP Pathology/Lab
    - FOP Pharmacy - General
    - FOP Pharmacy - Chemotherapy
    - FOP Cardiovascular
    - FOP PT/OT/ST
    - FOP Psychiatric - Partial Hospitalization
    - FOP Psychiatric - Intensive Outpatient
    - FOP Alcohol & Drug Abuse - Partial Hospitalization
    - FOP Alcohol & Drug Abuse - Intensive Outpatient
    - FOP Other - General
    - FOP Other - Blood
    - FOP Other - Clinic
    - FOP Other - Diagnostic
    - FOP Other - Dialysis
    - FOP Other - DME/Supplies
    - FOP Other - Trtmt/SpcltySvcs
    - FOP Other - Pulmonary
    - FOP Preventive - General
    - FOP Preventive - Colonoscopy
    - FOP Preventive - Mammography
    - FOP Preventive - Lipid Panel
    - PROF Inpatient Surgery
    - PROF Inpatient Anesthesia
    - PROF Outpatient Surgery
    - PROF Office Surgery
    - PROF Outpatient Anesthesia
    - PROF Maternity - Normal Deliveries
    - PROF Maternity - Cesarean Deliveries
    - PROF Maternity - Non-Deliveries
    - PROF Maternity - Ancillary
    - PROF Maternity - Anesthesia
    - PROF Inpatient Visits - Medical
    - PROF Inpatient Visits - Psychiatric
    - PROF Inpatient Visits - Alcohol and Drug Abuse
    - PROF Office/Home Visits - PCP
    - PROF Office/Home Visits - Specialist
    - PROF Urgent Care Visits
    - PROF Office Administered Drugs - General
    - PROF Office Administered Drugs - Chemotherapy
    - PROF Allergy Testing
    - PROF Allergy Immunotherapy
    - PROF Miscellaneous Medical - General
    - PROF Miscellaneous Medical - Gastroenterology
    - PROF Miscellaneous Medical - Ophthalmology
    - PROF Miscellaneous Medical - Otorhinolaryngology
    - PROF Miscellaneous Medical - Vestibular Function Tests
    - PROF Miscellaneous Medical - Non-Invas. Vasc. Diag. Studies
    - PROF Miscellaneous Medical - Pulmonology
    - PROF Miscellaneous Medical - Neurology
    - PROF Miscellaneous Medical - Central Nervous System Tests
    - PROF Miscellaneous Medical - Dermatology
    - PROF Miscellaneous Medical - Dialysis
    - PROF Preventive Other - General
    - PROF Preventive Other - Colonoscopy
    - PROF Preventive Other - Mammography
    - PROF Preventive Other - Lab
    - PROF Preventive Immunizations
    - PROF Preventive Well Baby Exams
    - Pharmacy Generic
    - Pharmacy Unknown
    - Applied Behavioral Analysis
    - FOP ER Observation
